# Supplementary material
Source: MDPI journal article supplement (https://www.mdpi.com/2072-4292/14/3/530)
Supplement: s1 [file s1]

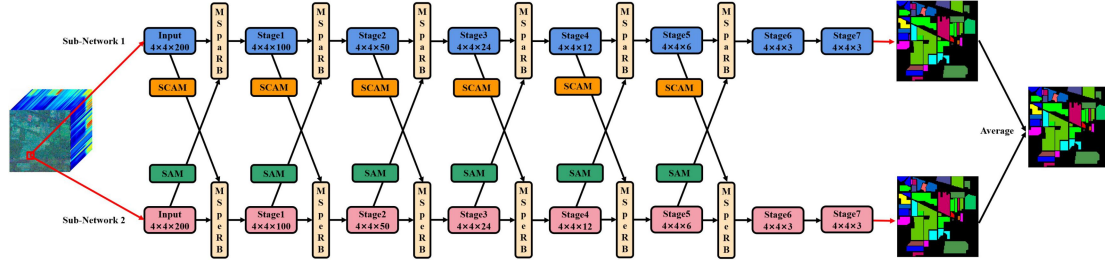

Figure S1. The network architecture corresponding to decision fusion

Table S1: The performance of DA-IMRN and AutoCNN when the ratio of pixels for training is set to be 4.20% (over the PU dataset).

|               | DA-IMRN | AutoCNN |
|---------------|---------|---------|
| <b>OA (%)</b> | 85.03   | 84.63   |
| <b>AA (%)</b> | 81.04   | 80.87   |
| <b>Kappa</b>  | 0.811   | 0.800   |
